# Supplementary material
Source: HighWire-hosted journal article supplement (https://fg.bmj.com/highwire/filestream/143472/field_highwire_adjunct_files/1/flgastro-2021-102027supp002_data_supplement.pdf)

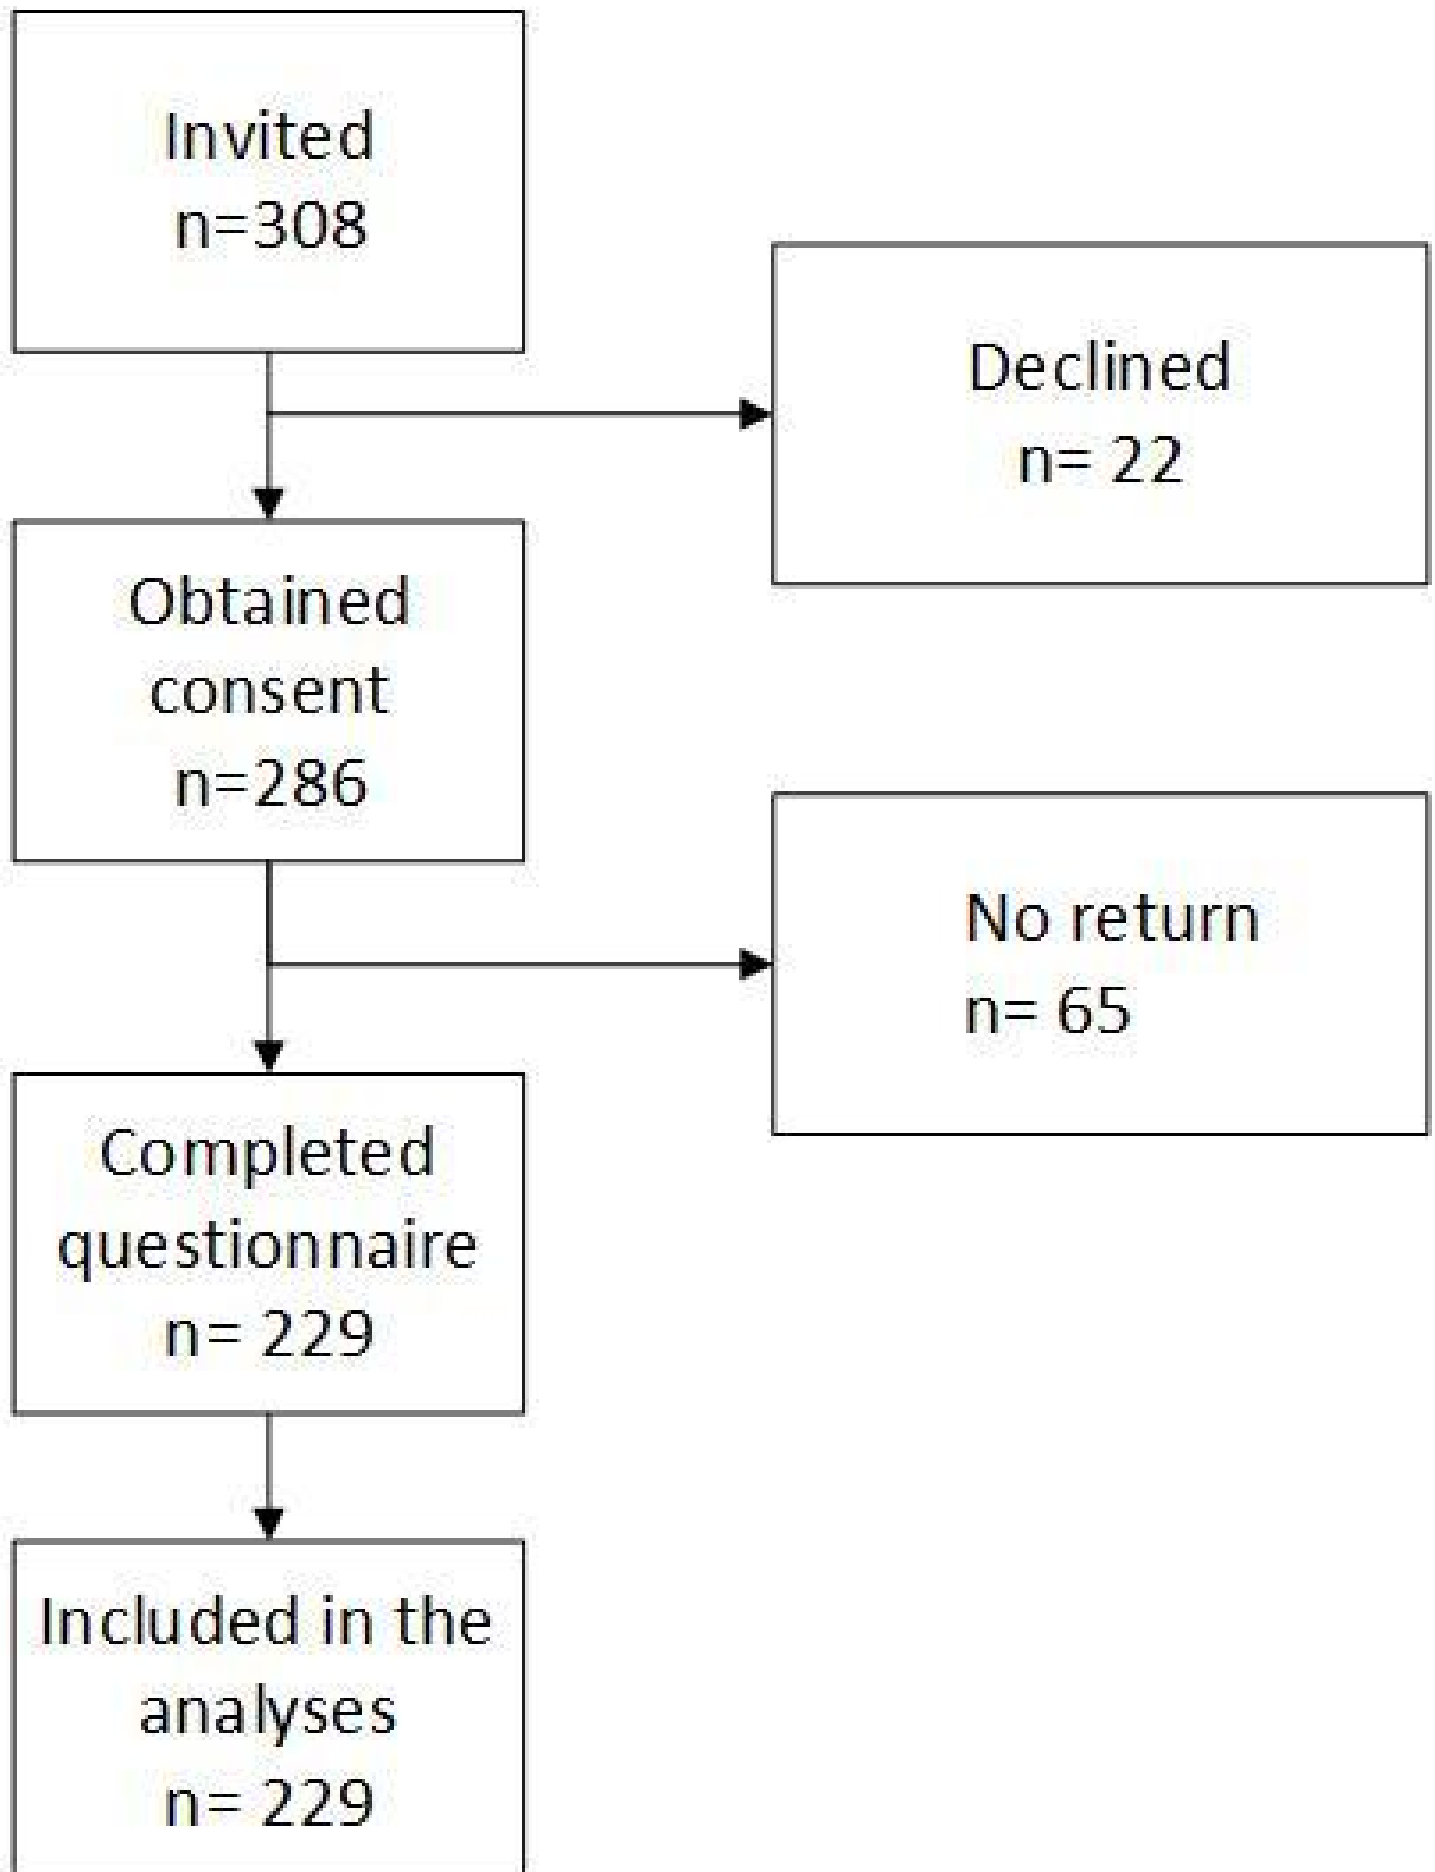

Supplement: flgastro-2021-102027supp002_data_supplement.pdf [file flgastro-2021-102027supp002_data_supplement.pdf]
